# Supplementary material for: Assessment of Trends in the Design, Accrual, and Completion of Trials Registered in ClinicalTrials.gov by Sponsor Type, 2000-2019
Source: PubMed Central journal article supplement (PMC7450351; doi:10.1001/jamanetworkopen.2020.14682), 2020-08-26
Supplement: jamanetwopen-3-e2014682-s001.pdf [file jamanetwopen-3-e2014682-s001.pdf]

## Supplementary Online Content

Gresham G, Meinert JL, Gresham AG, Meinert CL. Assessment of trends in the design, accrual, and completion of trials registered in ClinicalTrials.gov by sponsor type, 2000-2019. *JAMA Netw Open*. 2020;3(8):e2014682. doi:10.1001/jamanetworkopen.2020.14682

**eTable 1.** Selected Terms and Definitions Used on ClinicalTrials.gov

**eTable 2.** Number of Trials Started by Year Between 2000 and 2019

**eTable 3.** Predictors of Sample Size for Completed Trials in Multivariable Regression by Phase

**eTable 4.** Anticipated and Actual Sample Sizes for Trials Started and Completed Between 2010 Through 2019 by Lead Sponsor and Phase

**eFigure 1.** Time to Study Completion by Lead Sponsor

**eFigure 2.** Median Time (Years) to Trial Completion by Lead Sponsor and Phase

**eFigure 3.** Anticipated vs. Actual Sample Size of Trials Started and Completed Between 2010 Through 2019 by Lead Sponsor and Year

**eAppendix.** Example postgresSQL Code to Generate CT.gov Registration Dataset Used for Analysis

This supplementary material has been provided by the authors to give readers additional information about their work.

**eTable 1.** Selected terms and definitions used on ClinicalTrials.gov

| <b>Term</b>                                       | <b>ClinicalTrials.gov Definition</b>                                                                                                                                                                                                                                                                                                                                                                                                                                                                     |
|---------------------------------------------------|----------------------------------------------------------------------------------------------------------------------------------------------------------------------------------------------------------------------------------------------------------------------------------------------------------------------------------------------------------------------------------------------------------------------------------------------------------------------------------------------------------|
| <b>Clinical Study</b>                             | <i>A research study involving human volunteers (also called participants) that is intended to add to medical knowledge. There are two types of clinical studies: interventional studies (also called clinical trials) and observational studies.</i>                                                                                                                                                                                                                                                     |
| <b>Interventional Study (clinical trial)</b>      | <i>A type of clinical study in which participants are assigned to groups that receive one or more intervention/treatment (or no intervention) so that researchers can evaluate the effects of the interventions on biomedical or health-related outcomes. The assignments are determined by the study's protocol. Participants may receive diagnostic, therapeutic, or other types of interventions.</i>                                                                                                 |
| <b>Observational study</b>                        | <i>A type of clinical study in which participants are identified as belonging to study groups and are assessed for biomedical or health outcomes. Participants may receive diagnostic, therapeutic, or other types of interventions, but the investigator does not assign participants to a specific interventions/treatment.</i>                                                                                                                                                                        |
| <b>ClinicalTrials.gov identifier (NCT number)</b> | <i>The unique identification code given to each clinical study upon registration at ClinicalTrials.gov. The format is "NCT" followed by an 8-digit number (for example, NCT00000419).</i>                                                                                                                                                                                                                                                                                                                |
| <b>Funder type</b>                                | <i>Describes the organization that provides funding or support for a clinical study. This support may include activities related to funding, design, implementation, data analysis, or reporting. Organizations listed as sponsors and collaborators for a study are considered the funders of the study.</i>                                                                                                                                                                                            |
| <b>Sponsor</b>                                    | <i>The organization or person who initiates the study and who has authority and control over the study.</i>                                                                                                                                                                                                                                                                                                                                                                                              |
| <b>Collaborator</b>                               | <i>An organization other than the sponsor that provides support for a clinical study. This support may include activities related to funding, design, implementation, data analysis, or reporting.</i>                                                                                                                                                                                                                                                                                                   |
| <b>Phase</b>                                      | <i>The stage of a clinical trial studying a drug or biological product, based on definitions developed by the U.S. Food and Drug Administration (FDA). The phase is based on the study's objective, the number of participants, and other characteristics. There are five phases: Early Phase 1 (formerly listed as Phase 0), Phase 1, Phase 2, Phase 3, and Phase 4. Not Applicable is used to describe trials without FDA-defined phases, including trials of devices or behavioral interventions.</i> |
| <b>Phase 1</b>                                    | <i>A phase of research to describe clinical trials that focus on the safety of a drug. They are usually conducted with healthy volunteers, and the goal is to determine the drug's most frequent and serious adverse events and, often, how the drug is broken down and excreted by the body. These trials usually involve a small number of participants.</i>                                                                                                                                           |
| <b>Phase 2</b>                                    | <i>A phase of research to describe clinical trials that gather preliminary data on whether a drug works in people who have a certain condition/disease (that is, the drug's effectiveness). For example, participants receiving the drug may be compared to similar participants receiving a different treatment, usually an inactive substance (called a placebo) or a different drug. Safety continues to be evaluated, and short-term adverse events are studied.</i>                                 |
| <b>Phase 3</b>                                    | <i>A phase of research to describe clinical trials that gather more information about a drug's safety and effectiveness by studying different populations and</i>                                                                                                                                                                                                                                                                                                                                        |

|                             |                                                                                                                                                                                                                                                                                                                              |
|-----------------------------|------------------------------------------------------------------------------------------------------------------------------------------------------------------------------------------------------------------------------------------------------------------------------------------------------------------------------|
|                             | <i>different dosages and by using the drug in combination with other drugs. These studies typically involve more participants.</i>                                                                                                                                                                                           |
| <b>Phase 4</b>              | <i>A phase of research to describe clinical trials occurring after FDA has approved a drug for marketing. They include postmarket requirement and commitment studies that are required of or agreed to by the study sponsor. These trials gather additional information about a drug's safety, efficacy, or optimal use.</i> |
| <b>Phase Not Applicable</b> | <i>Describes trials without FDA-defined phases, including trials of devices or behavioral interventions.</i>                                                                                                                                                                                                                 |

\*All definitions transcribed from the ClinicalTrials.gov glossary available at :

<https://clinicaltrials.gov/ct2/about-studies/glossary>

**eTable 2.** Number of trials started by year between 2000 and 2019

| Year started | NIH/US Gov   | Industry      | Other          | Total          |
|--------------|--------------|---------------|----------------|----------------|
| 2000         | 320          | 454           | 1,087          | 1,861          |
| 2001         | 358          | 742           | 1,290          | 2,390          |
| 2002         | 426          | 1,358         | 1,699          | 3,483          |
| 2003         | 421          | 1,806         | 2,531          | 4,758          |
| 2004         | 552          | 2,412         | 3,347          | 6,311          |
| 2005         | 501          | 2,855         | 4,363          | 7,719          |
| 2006         | 527          | 3,574         | 5,186          | 9,287          |
| 2007         | 413          | 3,940         | 6,034          | 10,387         |
| 2008         | 403          | 4,344         | 7,091          | 11,838         |
| 2009         | 402          | 4,375         | 8,016          | 12,793         |
| 2010         | 457          | 4,261         | 8,621          | 13,339         |
| 2011         | 407          | 4,397         | 9,303          | 14,107         |
| 2012         | 341          | 4,254         | 10,291         | 14,886         |
| 2013         | 355          | 4,203         | 11,152         | 15,710         |
| 2014         | 335          | 4,533         | 12,394         | 17,262         |
| 2015         | 373          | 4,572         | 13,566         | 18,511         |
| 2016         | 350          | 4,528         | 14,690         | 19,568         |
| 2017         | 342          | 4,370         | 15,136         | 19,848         |
| 2018         | 357          | 4,656         | 15,473         | 20,486         |
| 2019         | 383          | 4,695         | 16,377         | 21,455         |
| <b>Total</b> | <b>8,023</b> | <b>70,329</b> | <b>167,647</b> | <b>245,999</b> |

**eTable 3.** Predictors of sample size for completed trials in multivariable regression by phase

| Variable                     | All Trials (N=103,300)          |         | Phase 1-2 (N=39,119)            |         | Phase 3-4 (N=30,017)            |         | Phase N/A (N=34,163)            |         |
|------------------------------|---------------------------------|---------|---------------------------------|---------|---------------------------------|---------|---------------------------------|---------|
|                              | Regression coefficient (95% CI) | P-value | Regression coefficient (95% CI) | P-value | Regression coefficient (95% CI) | P-value | Regression coefficient (95% CI) | P-value |
| Year started (every 5 years) | -8.2 (-9.1, -7.3)               | <0.001  | -2.2 (-2.9, -1.5)               | <0.001  | -8.8 (-12.3, -5.3)              | <0.001  | -4.2 (-7.5, -0.90)              | 0.01    |
| Lead sponsor:                |                                 |         |                                 |         |                                 |         |                                 |         |
| Industry                     | REF                             |         | REF                             |         | REF                             |         | REF                             |         |
| NIH/U.S. Gov                 | -12.7 (-14.9, -10.6)            | <0.001  | -2.5 (-4.0, -1.0)               | <0.001  | -82.7 (-96.4, -69.0)            | <0.001  | -2.2 (-6.6, 2.2)                | 0.33    |
| Other                        | -11.2 (-12.2, -10.2)            | <0.001  | -6.2 (-7.0, -5.4)               | <0.001  | -114.2 (-118.7, -109.7)         | <0.001  | -7.0 (-9.4, -4.7)               | <0.001  |
| Year*sponsor:                |                                 |         |                                 |         |                                 |         |                                 |         |
| Industry                     | REF                             |         | REF                             |         | REF                             |         | REF                             |         |
| NIH/U.S. Gov                 | -1.5 (-4.1, 1.0)                | 0.24    | -3.1 (-5.8, -2.3)               | <0.001  | -14.0 (-32.6-2.7)               | <0.097  | -3.4 (-9.1, 2.3)                | 0.24    |
| Other                        | 3.8 (2.6, 5.0)                  | <0.001  | -0.5 (-1.5, 0.5)                | 0.3     | -7.7 (-12.6, -2.7)              | <0.001  | -2.1 (-5.6, 1.4)                | 0.23    |
| Multisite                    | 25.1 (24.2, 26.0)               | <0.001  | 14.3 (13.5, 15.0)               | <0.001  | 63.3 (59.1, 67.6)               | <0.001  | 17.0 (15.4, 18.6)               | <0.001  |
| Randomized                   | 42.3 (41.4, 4.8)                | <0.001  | -- <sup>3</sup>                 | --      | 94.7 (59.1, 67.6)               | <0.001  | 30.6 (29.0, 32.2)               | <0.001  |

<sup>1</sup>Robust standard error regression to account for sample size with 95% Confidence Intervals (CI)

<sup>2</sup>For trials that started before 2015 to allow for sufficient time to completion

<sup>3</sup>Randomized design not included in model, as this is not a common feature in early-phase (phase 1/2) trial designs.

**eTable 4.** Anticipated and actual sample sizes for trials started and completed between 2010 through 2019 by lead sponsor and phase

| <b>Phase</b>      | <b>Funder</b> | <b>N</b> | <b>Anticipated Sample Size when started Median (IQR)</b> |           | <b>Actual Sample Size when completed Median (IQR)</b> |           |
|-------------------|---------------|----------|----------------------------------------------------------|-----------|-------------------------------------------------------|-----------|
| <b>All trials</b> | US gov't      | 1,555    | 66                                                       | (36-160)  | 49                                                    | (25-121)  |
|                   | Industry      | 29,950   | 80                                                       | (36-232)  | 61                                                    | (28-184)  |
|                   | Other         | 51,465   | 60                                                       | (30-150)  | 55                                                    | (26-120)  |
|                   | Total         | 79,000   | 68                                                       | (32-180)  | 57                                                    | (27-135)  |
| <b>Phase 1-2</b>  | US gov't      | 752      | 50                                                       | (30-95)   | 37                                                    | (20-72)   |
|                   | Industry      | 9,834    | 50                                                       | (28-100)  | 41                                                    | (24-84)   |
|                   | Other         | 7,376    | 40                                                       | (20-70)   | 31                                                    | (17-62)   |
|                   | Total         | 17,962   | 45                                                       | (24-90)   | 38                                                    | (20-75)   |
| <b>Phase 3-4</b>  | US gov't      | 122      | 190                                                      | (80-456)  | 139                                                   | (63-451)  |
|                   | Industry      | 5,906    | 280                                                      | (120-534) | 252                                                   | (103-519) |
|                   | Other         | 6,653    | 90                                                       | (44-200)  | 71                                                    | (39-151)  |
|                   | Total         | 12,667   | 150                                                      | (60-370)  | 119                                                   | (50-315)  |
| <b>Phase N/A</b>  | US gov't      | 553      | 100                                                      | (50-240)  | 62                                                    | (30-192)  |
|                   | Industry      | 2,529    | 60                                                       | (30-150)  | 52                                                    | (25-120)  |
|                   | Other         | 21,162   | 72                                                       | (38-180)  | 60                                                    | (30-130)  |
|                   | Total         | 24,244   | 72                                                       | (36-180)  | 59                                                    | (29-129)  |

**eFigure 1.** Time to study completion by lead sponsor

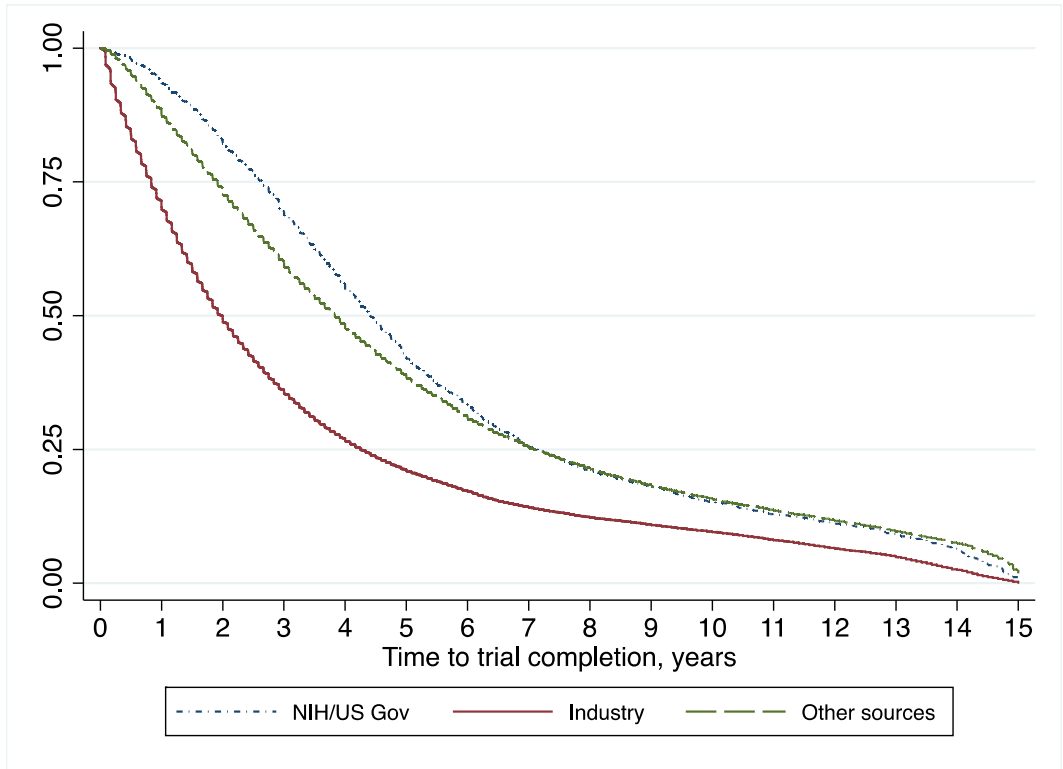

Kaplan-Meier Survival Curve of percent completed (y axis) by time to trial completion (x axis), calculated from start date to primary completion date among completed trials.

**Figure 2.** Median time (years) to trial completion for completed trials by lead sponsor and phase

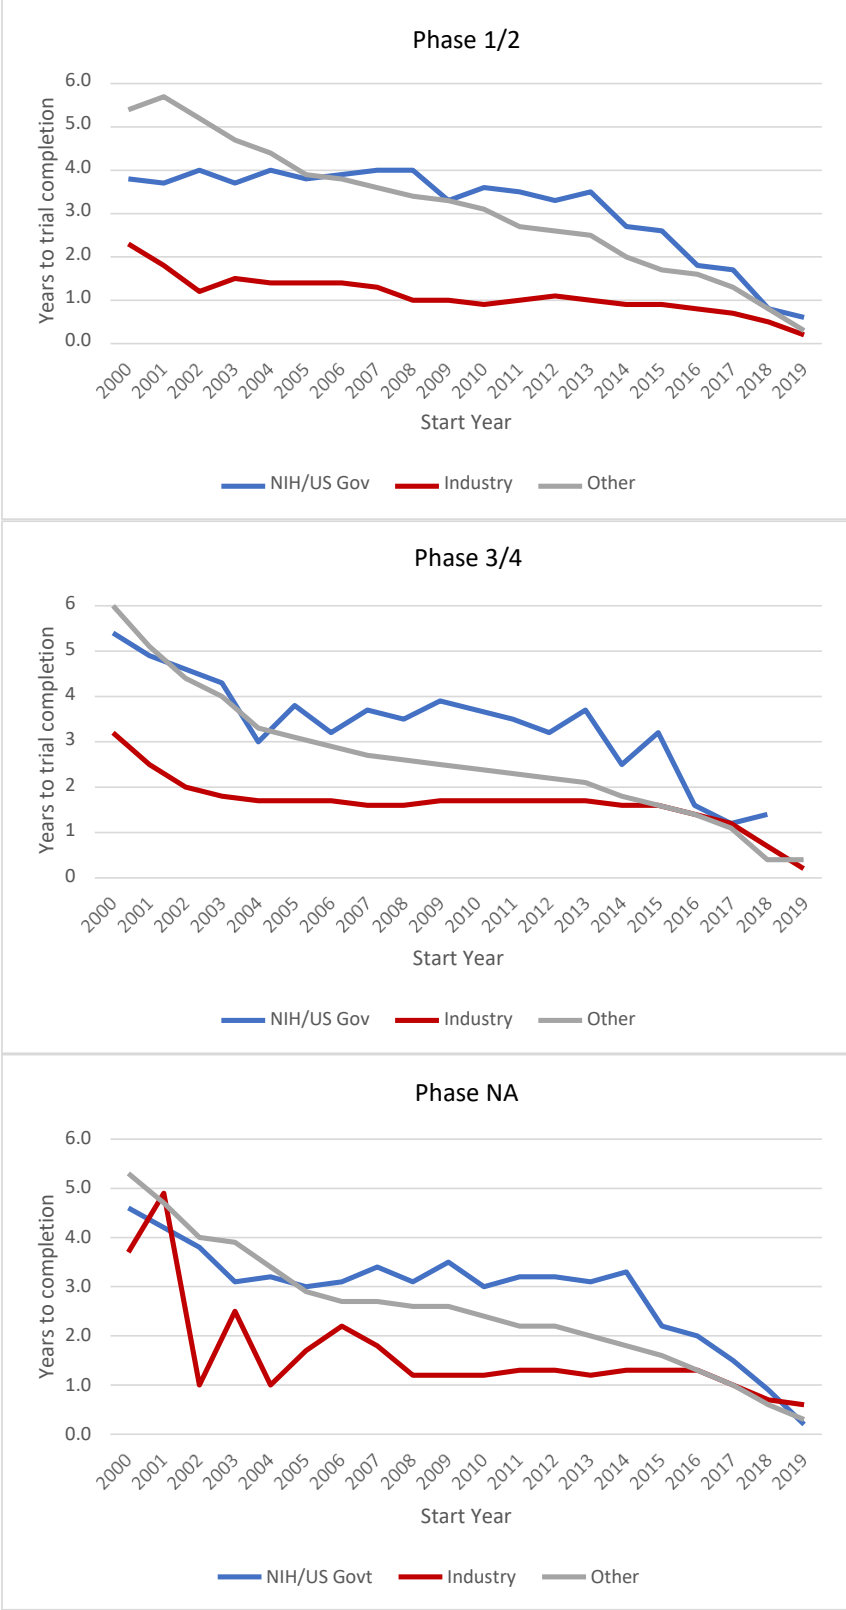



**eFigure3.** Anticipated versus actual sample size of trials started and completed between 2010 through 2019, by lead sponsor and year

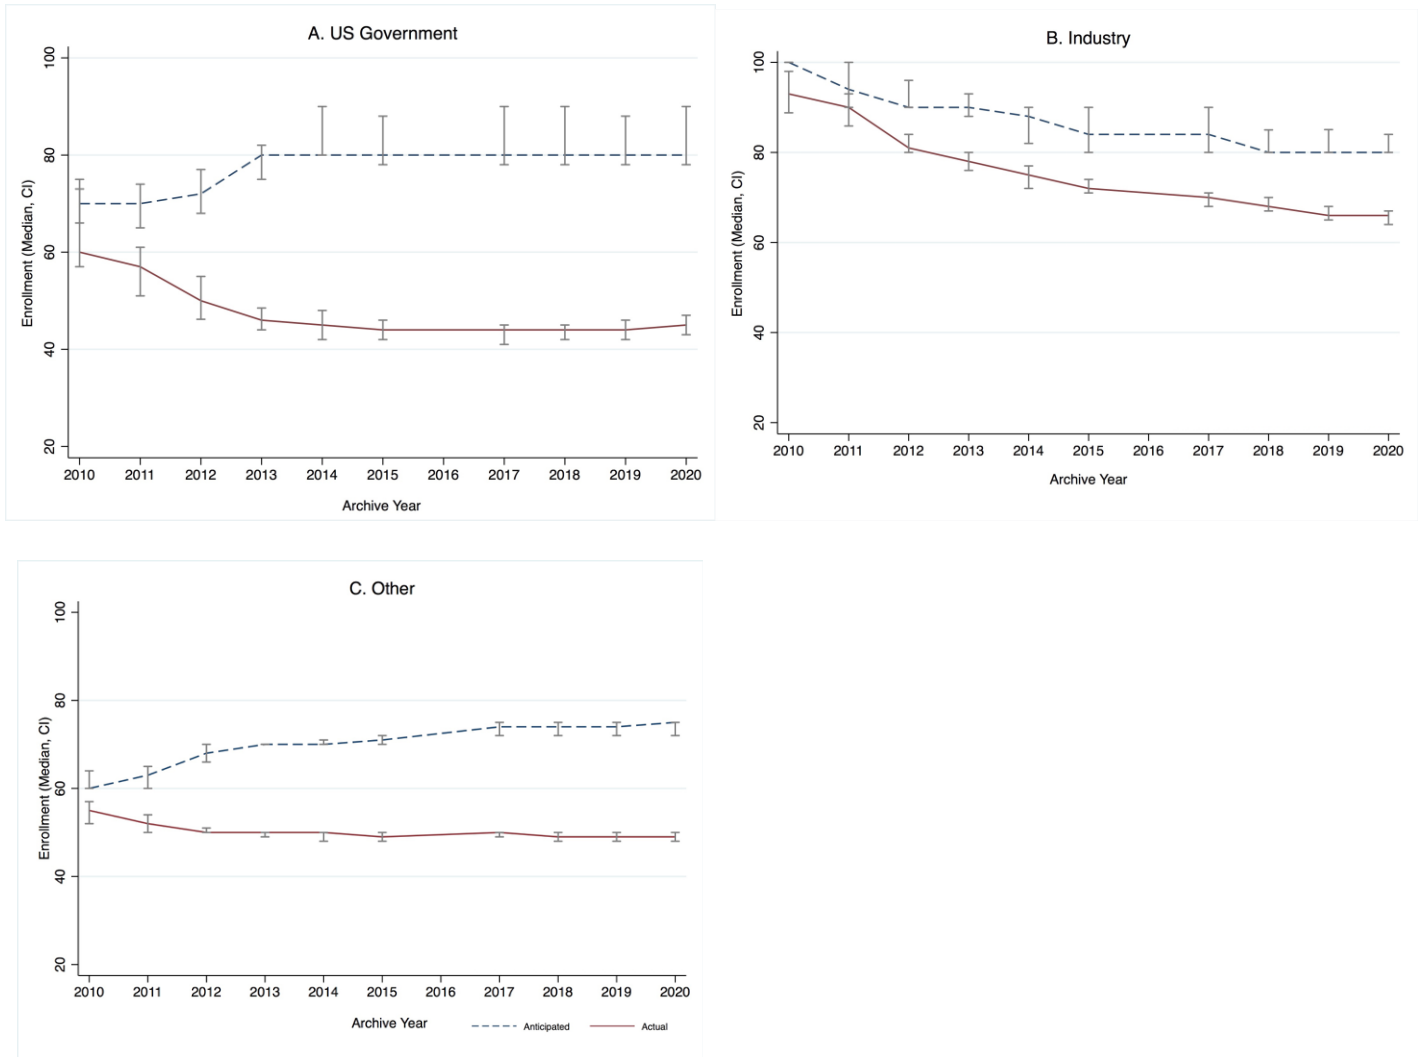

\*Archive year: A version of the AACT CTTI static database from each year available (2010-2020) as downloaded and sample sizes were compared between when trial was first registered (anticipated) and when trial was completed (actual). In 2016, AACT CTTI database was converted from Oracle to PostgreSQL, thus gap in enrollment data.

## eAppendix. Example postgresQL code to generate CT.gov registration dataset used for analysis

### a- Sample query using AACT database

```
Server [localhost]: aact-db.ctti-clinicaltrials.org
Database [postgres]: aact
Port [5433]: 5432
Username [postgres]: greshamg
Password for user greshamg:
psql (10.5, server 11.1)
WARNING: psql major version 10, server major version 11.
        Some psql features might not work.
Type "help" for help.

aact=> select count(distinct a.nct_id), a.agency_class, b.phase
aact->           from sponsors a join studies b
aact->           on b.nct_id = a.nct_id
aact->           join calculated_values c
aact->           on c.nct_id=a.nct_id
aact->
aact->           where b.overall_status = 'Completed'
aact->           and b.study_type = 'Interventional'
aact->           and extract(year from b.primary_completion_date) between 2006 and 2018
aact->           group by agency_class,
aact->           b.phase
aact->           order by agency_class,
aact->           b.phase
aact->           ;
```

### b- Code to create AACT registration dataset

```
create table t_cohort1 as
( select
  a.nct_id
, a.overall_status
, case when a.overall_status = 'Completed' then 'Completed'
  when a.overall_status in ('Terminated', 'Withdrawn', 'Suspended') then 'Stopped'
  when a.overall_status in ( 'Recruiting'
    , 'Not yet recruiting'
    , 'Active, not recruiting'
    , 'Enrolling by invitation') then 'Active'
  else a.overall_status -- overall_status = 'Unknown Status' or null or some new status
end as overall_status_grp
, a.phase
, case when a.phase in ('N/A') then 'N/A'
  else 'Phase' end as phase_grp_cat
, case when a.phase in ('Phase 1','Early Phase 1', 'Phase 1/Phase 2', 'Phase 2') then 'Phase_1_2'
  when a.phase in ('Phase 2/Phase 3', 'Phase 3','Phase 4') then 'Phase_3_4'
  else a.phase
end as phase_grp
, a.study_type
, b.lead_or_collaborator
, b.agency_class
, case when b.agency_class in ('NIH', 'U.S. Fed') then 'US_Fed_or_NIH'
  else b.agency_class
end as agency_class_grp
, start_date
, extract(year from a.start_date) as year_Started
-- , case when extract(year from a.start_date) in (2004,2005,2006,2007,2008) then 'Yr_2004_2008'
--   when extract(year from a.start_date) in (2009,2010,2011,2012,2013) then 'Yr_2009_2013'
--   when extract(year from a.start_date) in (2014,2015,2016,2017,2018) then 'Yr_2014_2018'
--   else extract(year from a.start_date)::text
-- end as year_started_grp
```

```

, start_date_type
, completion_date
, case when completion_date - start_date <= 0365 then '01
year or less'
  when completion_date - start_date > 0365 and completion_date - start_date <= 0730 then '01
year to 02 years'
  when completion_date - start_date > 0730 and completion_date - start_date <= 1095 then '02
years to 03 years'
  when completion_date - start_date > 1095 and completion_date - start_date <= 1460 then '03
years to 04 years'
  when completion_date - start_date > 1460 and completion_date - start_date <= 1826 then '04
years to 05 years'
  when completion_date - start_date > 1826 and completion_date - start_date <= 2191 then '05
years to 06 years'
  when completion_date - start_date > 2191 and completion_date - start_date <= 2556 then '06
years to 07 years'
  when completion_date - start_date > 2556 and completion_date - start_date <= 2921 then '07
years to 08 years'
  when completion_date - start_date > 2921 and completion_date - start_date <= 3287 then '08
years to 09 years'
  when completion_date - start_date > 3287 and completion_date - start_date <= 3652 then '09
years to 10 years'
  when completion_date - start_date > 3652 and completion_date - start_date <= 4017 then '10
years to 11 years'
  when completion_date - start_date > 4017 and completion_date - start_date <= 4382 then '11
years to 12 years'
  when completion_date - start_date > 4382 and completion_date - start_date <= 4748 then '12
years to 13 years'
  when completion_date - start_date > 4748 and completion_date - start_date <= 5113 then '13
years to 14 years'
  when completion_date - start_date > 5113 and completion_date - start_date <= 5478 then '14
years to 15 years'
  when completion_date - start_date > 5478 and completion_date - start_date <= 5843 then '15
years to 16 years'
  else (completion_date - start_date)::text
end as time_to_completion_grp
, extract(year from a.completion_date) as year_Completed
-- , case when extract(year from a.completion_date) in (2004,2005,2006,2007,2008) then 'Yr_2004_2008'
--   when extract(year from a.completion_date) in (2009,2010,2011,2012,2013) then 'Yr_2009_2013'
--   when extract(year from a.completion_date) in (2014,2015,2016,2017,2018) then 'Yr_2014_2018'
--   else extract(year from a.completion_date)::text
-- end as year_completed_grp
, completion_date_type
, primary_completion_date
, primary_completion_date_type
, last_update_submitted_date
, results_first_posted_date
, results_first_posted_date_type

, enrollment
, case when enrollment > 0 then 'enrollment data exists'
  when enrollment = 0 then 'enrollment data zero'
  when enrollment is null then 'enrollment data null'
  else enrollment::text
end as enrollment_grp
, case when enrollment > 0 and enrollment <= 50 then 'enrollment 001 to 0050'
  when enrollment > 50 and enrollment <= 100 then 'enrollment 051 to 0100'
  when enrollment > 100 and enrollment <= 500 then 'enrollment 101 to 0500'
  when enrollment > 500 and enrollment <= 1000 then 'enrollment 501 to 1000'
  when enrollment > 1000 then 'enrollment over 1000'
end as enrollment_count_grp
, why_stopped
, c.allocation
, case
  when c.allocation is null then '(null)'
  when c.allocation in ('Randomized', 'Random Sample') then 'Random'
  when c.allocation = 'Non-Randomized' then 'Non-Random'
  else c.allocation
end as allocation_grp
, c.masking
, case when c.masking in (

```

```

        'Triple'
      , 'Quadruple'
      , 'Single'
      , 'Double'
    ) then 'Masked 1/2/3/4'
    else c.masking
  end as masking_grp
, d.were_results_reported
, d.months_to_report_results
, d.has_single_facility
, f.number_of_facilities
, case when f.number_of_facilities > 0      then 'facilities data exists'
    when f.number_of_facilities is null then 'facilities data null'
    else f.number_of_facilities::text
  end as facilities_grp
, case when f.number_of_facilities > 0 and f.number_of_facilities <= 1 then 'facilities
001'
    when f.number_of_facilities > 1 and f.number_of_facilities <= 10 then 'facilities 002 to
010'
    when f.number_of_facilities > 10 and f.number_of_facilities <= 100 then 'facilities 011 to
100'
    when f.number_of_facilities > 100                                then 'facilities over
100'
  end as facilities_count_grp
, g.gender
, case when g.gender = 'Female'          then 'Female Only'
    when g.gender in ('Male', 'All') then 'Male / All'
    when ( g.gender is null or g.gender = '' ) then 'gender data null or blank'
    else g.gender
  end as gender_grp
, i.number_of_interventions      as number_of_interventions
, i.number_of_intervention_types as number_of_intervention_types
, i.intervention_type_list::text as intervention_type_list
, case
  when lower(i.intervention_type_list::text) like '%null%'
    and i.number_of_intervention_types = 1 then '(null)'
  when lower(i.intervention_type_list::text) like '%drug%'
    and i.number_of_intervention_types = 1 then 'Drug'
  when lower(i.intervention_type_list::text) like '%drug%'
    and i.number_of_intervention_types > 1 then 'Drug and Other'
  when lower(i.intervention_type_list::text) not like '%drug%'
    then 'Other'

  else i.intervention_type_list::text
end as intervention_types_grp
, bcc.number_of_browse_conditions      as number_of_browse_conditions
, bcc.mesh_term_list                  as mesh_term_list
, case
  when lower(bcc.mesh_term_list::text) is null then '(null) '
  when lower(bcc.mesh_term_list::text) like '%carcinoma%'
    or lower(bcc.mesh_term_list::text) like '%leukemia%'
    or lower(bcc.mesh_term_list::text) like '%neoplasm%'
    or lower(bcc.mesh_term_list::text) like '%cancer%'
    or lower(bcc.mesh_term_list::text) like '%lymphoma%' then 'Cancer'
  -- when lower(bcc.mesh_term_list::text) like '%coronary%'
  -- or lower(bcc.mesh_term_list::text) like '%lung%' then 'Heart/Lung'
  -- when lower(bcc.mesh_term_list::text) like '%hiv%' then 'HIV'
  -- when lower(bcc.mesh_term_list::text) like '%kidney%' then 'Kidney'
  -- when lower(bcc.mesh_term_list::text) like '%stroke%' then 'Stroke'
  -- when lower(bcc.mesh_term_list::text) like '%depressi%' then 'Depression'
  -- when lower(bcc.mesh_term_list::text) like '%diabetes%' then 'Diabetes'
  -- when lower(bcc.mesh_term_list::text) like '%arthriti%' then 'Arthritis'
  -- when lower(bcc.mesh_term_list::text) like '%infection%' then 'Infection'
  else 'Other'
end
as mesh_term_list_grp
, cc.number_of_conditions
, cc.name_list as conditions_name_list
, case
  when lower(cc.name_list::text) is null then '(null) '
  when lower(cc.name_list::text) like '%healthy%' then 'Healthy'
  when lower(cc.name_list::text) like '%carcinoma%'
    or lower(cc.name_list::text) like '%leukemia%'

```

```

        or      lower(cc.name_list::text)    like '%neoplasm%'
        or      lower(cc.name_list::text)    like '%cancer%'
        or      lower(cc.name_list::text)    like '%lymphoma%'    then 'Cancer'
    else      'Other'
end
as conditions_name_list_grp

from studies a
    join sponsors b on
        a.nct_id = b.nct_id
    join designs c on
        a.nct_id = c.nct_id
    join calculated_values d on
        a.nct_id = d.nct_id
left outer
    join facilities_counts f on
        a.nct_id = f.nct_id
    join eligibilities g on
        a.nct_id = g.nct_id
left outer
    join intervention_type_lists i on
        a.nct_id = i.nct_id
left outer
    join browse_conditions_counts bcc on
        a.nct_id = bcc.nct_id
left outer
    join conditions_name_lists cc on
        a.nct_id = cc.nct_id
where b.lead_or_collaborator = 'lead'
-- and overall_status = 'Completed'
and study_type = 'Interventional'
-- and (    extract(year from start_date)    between 2004 and 2018
--      )
)
;
alter table t_cohort1
    add primary key (nct_id);
vacuum full t_cohort1 ;

```
